# Supplementary material for: Nanobody–Antigen Conjugates Elicit HPV-Specific Antitumor Immune Responses
Source: Oxford University Press journal article supplement (doi:10.1158/2326-6066.cir-17-0661), 2018-05-23
Supplement: 23266066cir170661-sup-192648_3_supp_4729352_p83c5j.docx [file 23266066cir170661-sup-192648_3_supp_4729352_p83c5j.docx]

**Supplemental Table 1**

| VHH | Amino acid sequence |
| --- | --- |
| VHHCD11b | QVQLQESGGGLVQAGGSHNLSCTASGITFSSLAMGWFRQTPGKEREFVANIMRSGSSVFYADSVRGRFTISRDNAKNTAHLQMNSLKPEDTAVYFCAATRGAWPAEYWGQGTQVTVSSGGLPETGGHHHHHH |
| VHHCD8 | QVQLQESGGGLVQAGGSLRLSCAASGFTFDDYAIGWFRQAPGKEREGVSCINNSDGSGYVADSVKGRFTISSDNAKNTVYLQMNSLKPEDTAVYYCAAAGDGGCYYGLDYWGKGTQVTVSSGGLELPETGGHHHHHH |
